# Supplementary material for: Carbon-MEMS based rectangular channel microarrays embedded pencil trace for high rate and high-performance lithium-ion battery application
Source: Royal Society of Chemistry journal article supplement (doi:10.1039/d1ma00745a), 2021-01-01
Supplement: d1ma00745a1.pdf [file d1ma00745a1.pdf]

## **Carbon-MEMS based Rectangular Channel Microarrays Embedded Pencil Trace for High Rate and High-Performance Lithium-ion Battery Application**

Ananya Gangadharan, Suresh Kali, Suresh Mamidi\* Anil D. Pathak and Chandra S. Sharma

*Creative & Advanced Research Based On Nanomaterials (CARBON) Laboratory,*

*Department of Chemical Engineering, Indian Institute of Technology Hyderabad,*

*Kandi-502285, Sangareddy, Telangana, India*

\*Corresponding author email: [ch14m16p000003@iith.ac.in](mailto:ch14m16p000003@iith.ac.in)

### **Supporting Information**

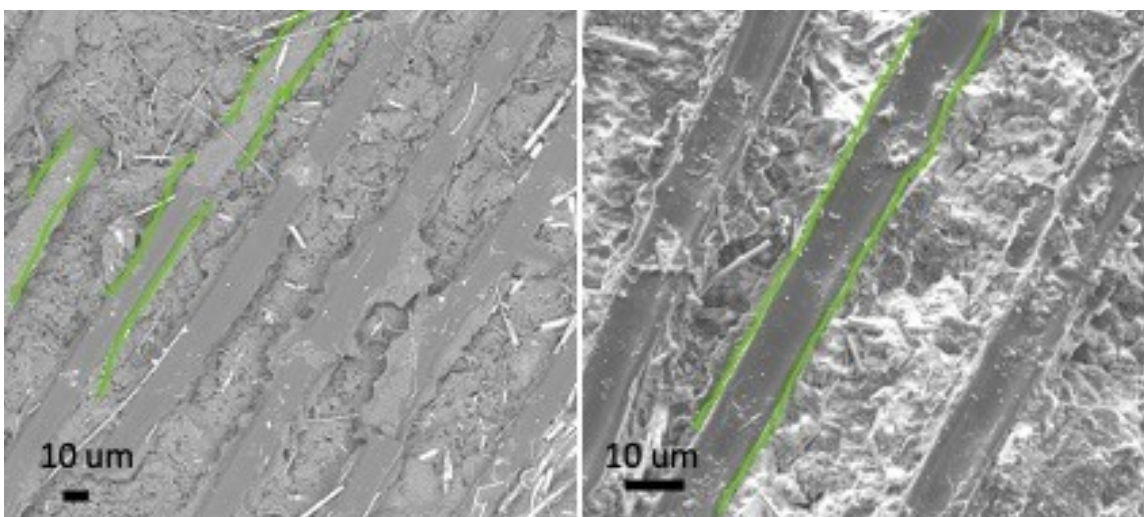

**Fig. S1** SEM image of 3D-RCPTSS after cycling the cell

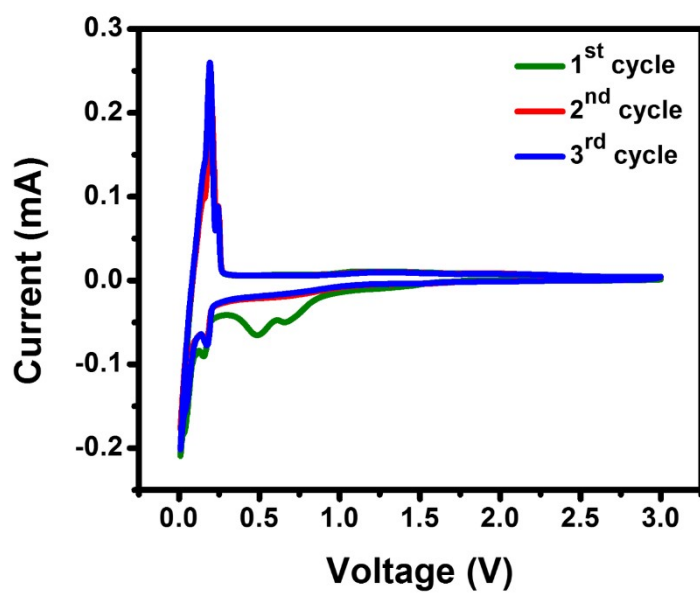

**Fig. S2** Cyclic voltammetry only PTSS at scan rate of  $0.1 \text{ mVs}^{-1}$  in the voltage window of 0.01 to 3V

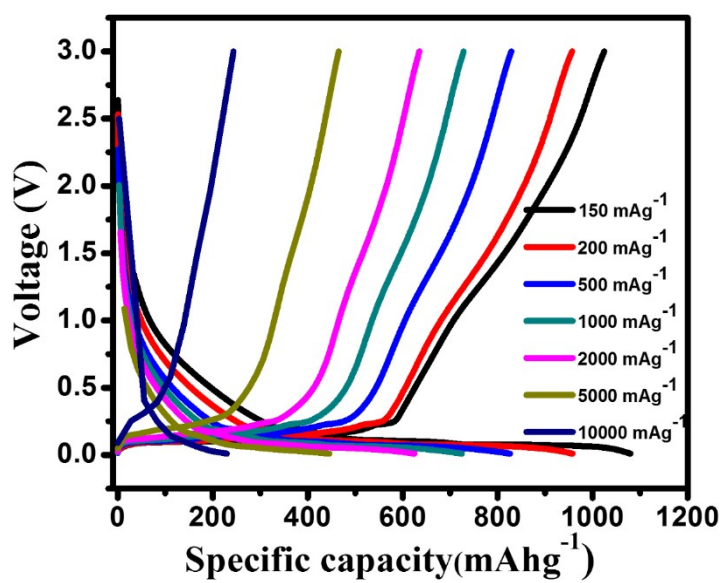

**Fig. S3** GCD only PTSS at different scan rates in the voltage window of 0.01 to 3V

**Table 1:**

| Electrode type                                     | Specific capacity              | Substrate               | Current density<br>[mA g <sup>-1</sup> ]          |
|----------------------------------------------------|--------------------------------|-------------------------|---------------------------------------------------|
| CuO flakes over<br>patterned Cu foil <sup>30</sup> | 550 mAh g <sup>-1</sup>        | Copper                  | 0.1 C rate (100<br>cycles)                        |
| C-MEMS <sup>31</sup>                               | ~220 mAh g <sup>-1</sup>       | Silicon                 | 0.5828 mA (9 cycles)                              |
| C-MEMS (cross<br>shaped) <sup>13</sup>             | ~200mAhg <sup>-1</sup>         | Silicon                 | 76.4 $\mu$ A cm <sup>-2</sup> (6<br>cycles)       |
| C-MEMS <sup>10</sup>                               | 596 mAh g <sup>-1</sup>        | Stainless steel         | 37.4 mA g <sup>-1</sup> (160<br>cycles)           |
| CMEMS pillars <sup>32</sup>                        | 538 mAh g <sup>-1</sup>        | Pencil traced SS        | 500 mA g <sup>-1</sup>                            |
| <b>3DRC-PTSS<br/>(Present study)</b>               | <b>~400 mAh g<sup>-1</sup></b> | <b>Pencil traced SS</b> | <b>10,000 mA g<sup>-1</sup> (1750<br/>cycles)</b> |

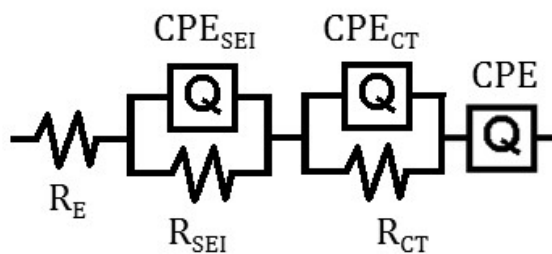**Fig. S4** Electrochemical impedance circuit

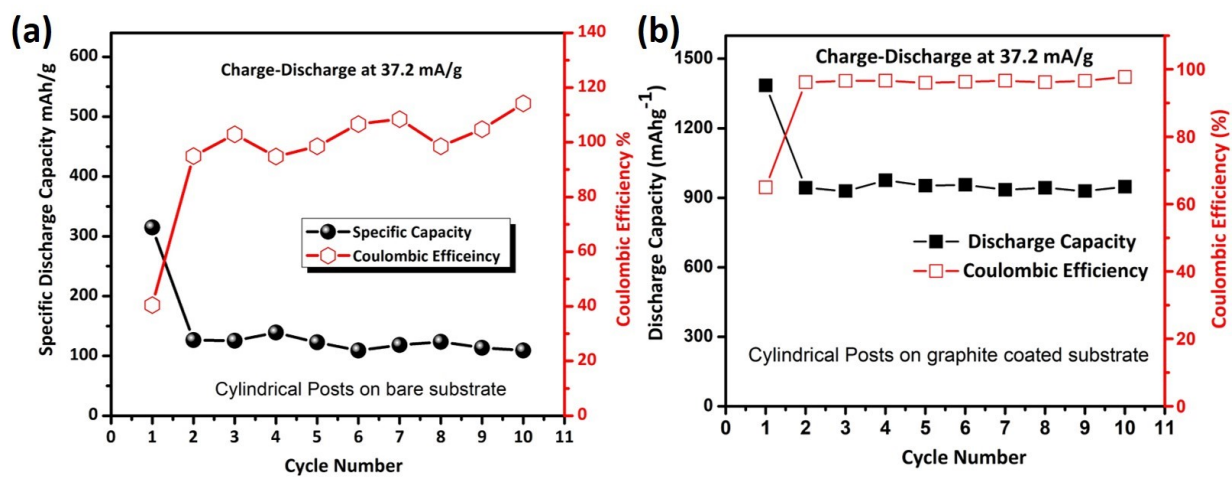

**Fig. S5:** (a) GCD of cylindrical posts on bare SS substrate at 37.2 mA/g (b) GCD of cylindrical posts on pencil coated SS substrate at 37.2 mA/g
